# Supplementary material for: Long-range regulatory interactions at the 4q25 atrial fibrillation risk locus involve PITX2c and ENPEP
Source: PubMed Central journal article supplement (PMC4416339; doi:10.1186/s12915-015-0138-0), 2015-04-17

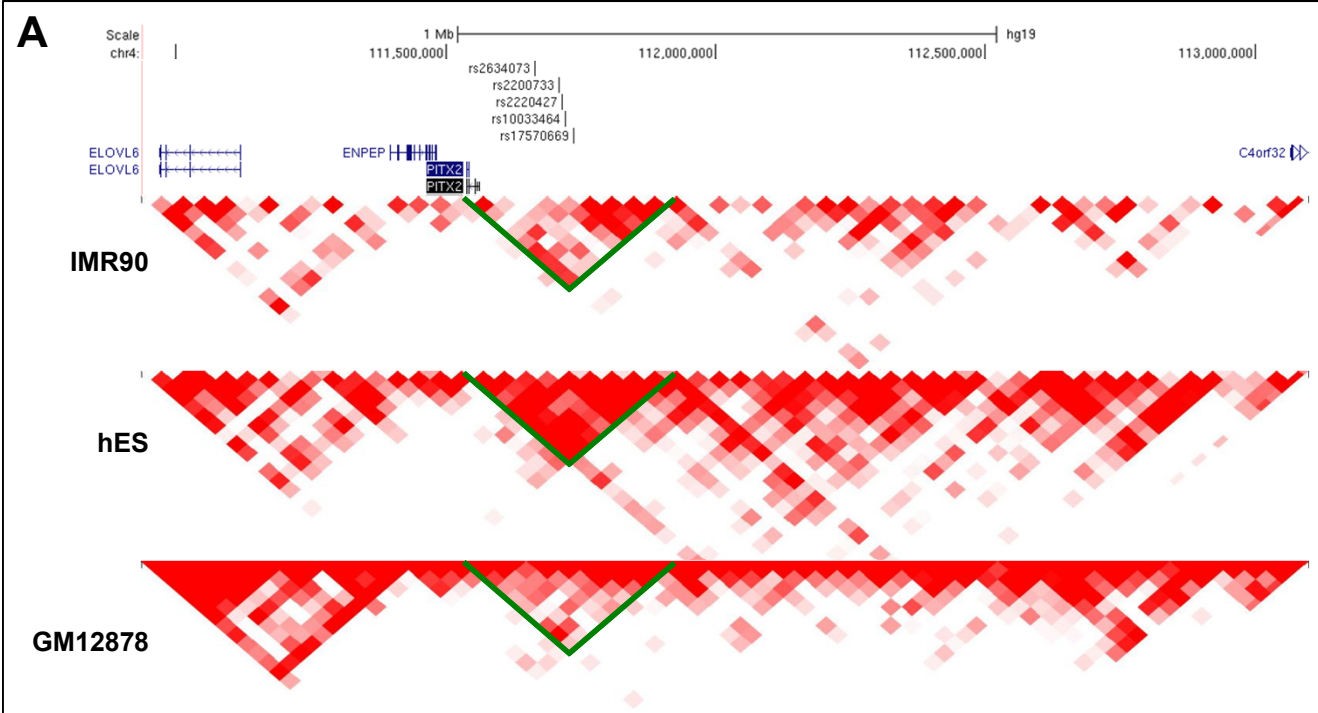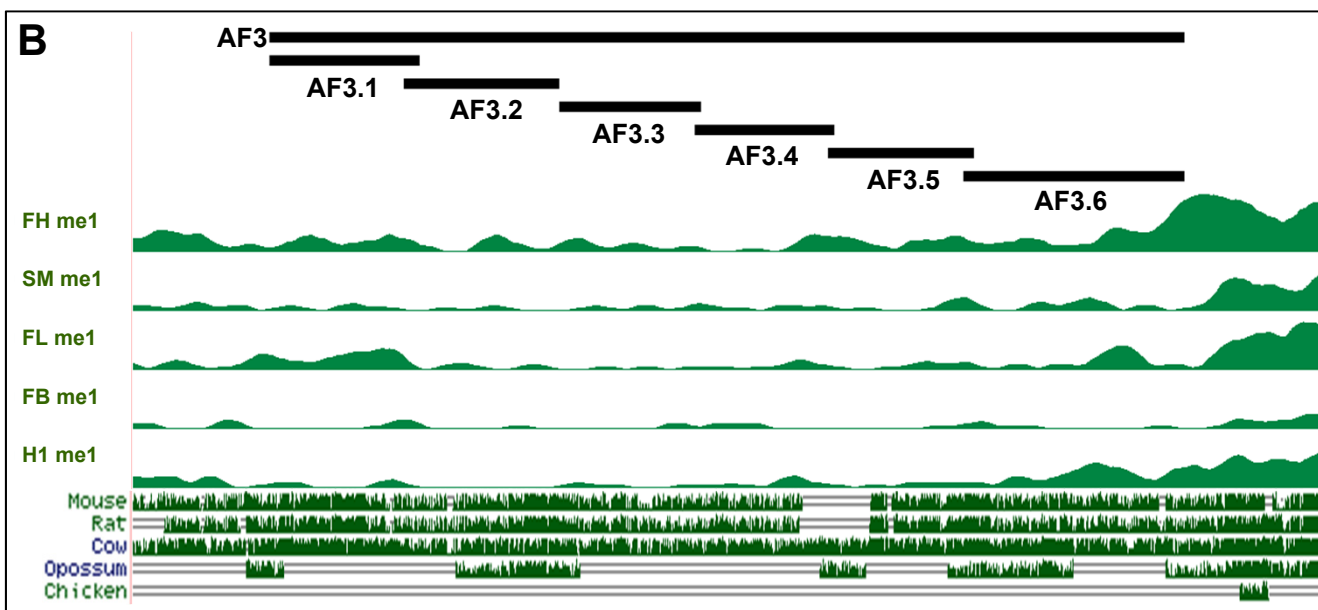

Supplement: 12915_2015_138_MOESM1_ESM.pdf [file 12915_2015_138_MOESM1_ESM.pdf]
