# Supplementary material for: Long-range regulatory interactions at the 4q25 atrial fibrillation risk locus involve PITX2c and ENPEP
Source: PubMed Central journal article supplement (PMC4416339; doi:10.1186/s12915-015-0138-0), 2015-04-17
Supplement: 12915_2015_138_MOESM2_ESM.pdf [file 12915_2015_138_MOESM2_ESM.pdf]

## Additional file 2. Results of transgenic experiments.

| fragment            | # lacZ+ | # tg | % lacZ+ | # embryos | % tg |
|---------------------|---------|------|---------|-----------|------|
| AF3                 | 5       | 11   | 45      | 37        | 30   |
| AF3 (newborn heart) | 0       | 6    | 0       | 43        | 14   |
| AF4                 | 0       | 9    | 0       | 41        | 22   |
| AF5                 | 0       | 13   | 0       | 45        | 29   |
| AF7                 | 1       | 21   | 5       | 131       | 16   |
| AF3.5               | 2       | 10   | 20      | 110       | 9    |
| AF3.6               | 4       | 17   | 24      | 107       | 16   |
| AF3.5 $\cap$ 3.6    | 1       | 17   | 6       | 52        | 33   |
| ASE                 | 5       | 13   | 38      | 46        | 28   |
| ASE + AF3.6         | 10      | 22   | 45      | 99        | 22   |
