# Supplementary material for: Long-range regulatory interactions at the 4q25 atrial fibrillation risk locus involve PITX2c and ENPEP
Source: PubMed Central journal article supplement (PMC4416339; doi:10.1186/s12915-015-0138-0), 2015-04-17
Supplement: 12915_2015_138_MOESM4_ESM.pdf [file 12915_2015_138_MOESM4_ESM.pdf]

**Additional File 4.** Assessment of reporter activity in ASE and ASE+AF3.6 transgenic embryos.

|                  | <b>embryo</b> | <b>OFT</b> | <b>AVC</b> | <b>LA</b> | <b>RV/IVS</b> |
|------------------|---------------|------------|------------|-----------|---------------|
| <b>ASE</b>       | #1            | -          | +          | -         | -             |
|                  | #2            | +          | +          | +         | +             |
|                  | #3            | +          | +          | -         | +             |
|                  | #4            | +          | +          | +         | +             |
|                  | #5            | -          | -          | -         | -             |
| <b>ASE+AF3.6</b> | #6            | +          | +          | +         | +             |
|                  | #7            | -          | -          | -         | -             |
|                  | #8            | -          | +          | +         | +             |
|                  | #9            | +          | +          | +         | -             |
|                  | #10           | -          | -          | -         | -             |
|                  | #11           | -          | +          | +         | +             |
|                  | #12           | -          | -          | -         | -             |
|                  | #13           | +          | +          | +         | +             |
|                  | #14           | -          | +          | +         | -             |
|                  | #15           | -          | +          | +         | -             |

OFT, outflow tract; AVC, atrioventricular canal; LA, left atrium; RV/IVS, right ventricle/interventricular septum.
