# Supplementary material for: Long-range regulatory interactions at the 4q25 atrial fibrillation risk locus involve PITX2c and ENPEP
Source: PubMed Central journal article supplement (PMC4416339; doi:10.1186/s12915-015-0138-0), 2015-04-17
Supplement: 12915_2015_138_MOESM6_ESM.pdf [file 12915_2015_138_MOESM6_ESM.pdf]

**Additional File 6.** Primers used in this study.

| <b>4q25 fragments</b> |                                              |
|-----------------------|----------------------------------------------|
| AF1-Forward           | GCAATTCTGTGTTAATATAAGAG                      |
| AF1-Reverse           | GGCCATCAGTAAATCACATTT                        |
| AF2-Forward           | GCTAAGCTCGCCCCAAGC                           |
| AF2-Reverse           | GCTAGTATCTTGATGACTTTAT                       |
| AF3-Forward           | GCAAGAACCAACTAGGGCCA                         |
| AF3-Reverse           | ATGGAGAATGTAAGTTTGGAGC                       |
| AF4-Forward           | GCACTGGCTGGATTACATACTTT                      |
| AF4-Reverse           | ACTATTTGATAGCCTCAGAGC                        |
| AF5-Forward           | GCAGGGAACATAGGTAAGCTT                        |
| AF5-Reverse           | ACATATGCAGAGGTAGAATTGC                       |
| AF6-Forward           | GCCCAAAACACCTCCAAGT                          |
| AF6-Reverse           | GGGATAACAAATCTGAAAGC                         |
| AF7-Forward           | GCTGCAAGATAGTATCAATTAAGC                     |
| AF7-Reverse           | GCTGTTTGCCTCTTCACAATTC                       |
| AF3.1-Forward         | GCAAGAACCAACTAGGGCCA                         |
| AF3.1-Reverse         | CCTGTTTACTTGTTAGAGATAACAGG                   |
| AF3.2-Forward         | CCAACCCAAATTGACAAATTCCTGA                    |
| AF3.2-Reverse         | CATGCAAGACAGAACTCAACAGC                      |
| AF3.3-Forward         | CGACTCCCTTTCTGACTTTTCAT                      |
| AF3.3-Reverse         | GACAGTGACTCTCAAACCTTAGC                      |
| AF3.4-Forward         | GCTCTCCAGGAGGTTTTCATG                        |
| AF3.4-Reverse         | CGGATCACCAAATCCAAAGGC                        |
| AF3.5-Forward         | CCAGGAGAATAAGAATTGAGAAG                      |
| AF3.5-Reverse         | CAGATTAAGGCAAGCTCTCACC                       |
| AF3.6-Forward         | GGTTGTTTCTGGCTTTAAAT                         |
| AF3.6-Reverse         | ATGGAGAATGTAAGTTTGGAGC                       |
| AF3.5Δ-Forward        | CCAGGAGAATAAGAATTGAGAAG                      |
| AF3.5Δ-Reverse        | ACATGAAATCTGGAAAGAATAA                       |
| AF3.6Δ-Forward        | ATCTATTCCAGAGCAAAATCTCT                      |
| AF3.6Δ-Reverse        | ATGGAGAATGTAAGTTTGGAGC                       |
| AF3.5∩3.6-Forward     | CCATCATCTGCACAATGAGCA                        |
| AF3.5∩3.6-Reverse     | CAGATTAAGGCAAGCTCTCAC                        |
| ASE-Sall-Forward      | <u>GTTCGACCGCCCGCTATTC</u> CGCAGCTC*         |
| ASE-XhoI-Reverse      | <b><u>CTCGAG</u></b> CCAACACTCTTTCTCGCCTAGC† |

\*Underlined italicized sequence corresponds to the Sall recognition site tag.

†Bold italicized sequence corresponds to the XhoI recognition site tag.

| <b>Chromosome conformation capture (3C)</b> |                         |
|---------------------------------------------|-------------------------|
| XPB/Eccr3-Forward                           | TGACCTCCACACTCCTGAC     |
| XPB/Eccr3-Reverse                           | ATGCGCAATTAGAAACTGC     |
| Pitx2ab                                     | CAGAAGCACACATTCCACAGAGC |
| Pitx2c                                      | GTTGGAGGACGCGTACGCCAC   |

|          |                            |
|----------|----------------------------|
| Enpep    | TCTCCTTGTGGGAAGAGATC       |
| c1       | ACCCAACATCAACCATTGCT       |
| c2       | CTGACCCTGCGTTCCATACT       |
| c3       | AGTGCTTTGAATGAGCTTTGG      |
| c4       | TGCATTTGCTCAAGGATTTG       |
| c5       | GCTGAGAACCCTGAAGTTGC       |
| Hind-1F  | TCACCACTGTTCTTAGCTTGAGTGC  |
| Hind-2R  | CCATGAGAGCTTCTTGACTGTTTGG  |
| Hind-3F  | CCCATGCTTTCTGTCCTAAACC     |
| Hind-4R  | CCATGGTAATGCACATGGAAGG     |
| Hind-5R  | GGATTCAAACCTCAGACCCTGTT    |
| Hind-6F  | TGGCTCAGCACTTCACTCATCC     |
| Hind-7F  | TCCTCCTAGCTGGCCTATATTTCTG  |
| Hind-8F  | GGCCCACAAAGCTGGGTAGC       |
| Hind-9R  | TTGGCATTAGTGTGTCCTTACAAAGC |
| Hind-10F | AGCTTGTAGACACAATCCTTGC     |

|                                    |                       |
|------------------------------------|-----------------------|
| <b>Transgenic mouse genotyping</b> |                       |
| Myogenin-Forward                   | CCAAGTTGGTGTCAAAAGCC  |
| Myogenin-Reverse                   | CTCTCTGCTTTAAGGAGTCAG |
| LacZ-Forward                       | GCGACTTCCAGTTCAACATC  |
| LacZ-Reverse                       | GATGAGTTTGGACAAACCAC  |

|                                    |                                                           |
|------------------------------------|-----------------------------------------------------------|
| <b>In situ hybridization (ISH)</b> |                                                           |
| Enpep-Forward                      | <u>ATTTAGGTGACACTATAGAA</u> CCGTCATCCGCTACATCTC*          |
| Enpep-Reverse                      | <b><i>GTAATACGACTCACTATAGGG</i></b> ATGGCAATACACCCTGCAA†  |
| Hcn4-Forward                       | <u>ATTTAGGTGACACTATAGA</u> AAGCATGATGCTTCTGCTGTGT*        |
| Hcn4-Reverse                       | <b><i>GTAATACGACTCACTATAGGG</i></b> TTGAAGTTGTCCACGCTCAG† |

\*Underlined italicized sequences correspond to the SP6 RNA polymerase initiation site tag.

†Bold italicized sequences correspond to the T7 RNA polymerase initiation site tag.
